# Supplementary material for: Real-Time Assessment of Alcohol Reward, Stimulation, and Negative Affect in Individuals With and Without Alcohol Use Disorder and Depressive Disorders
Source: Atypon-hosted journal article supplement (doi:10.1176/appi.ajp.20240069), 2025-02-01
Supplement: appi.ajp.20240069.ds001.pdf [file appi.ajp.20240069.ds001.pdf]

**Supplemental Screening Data**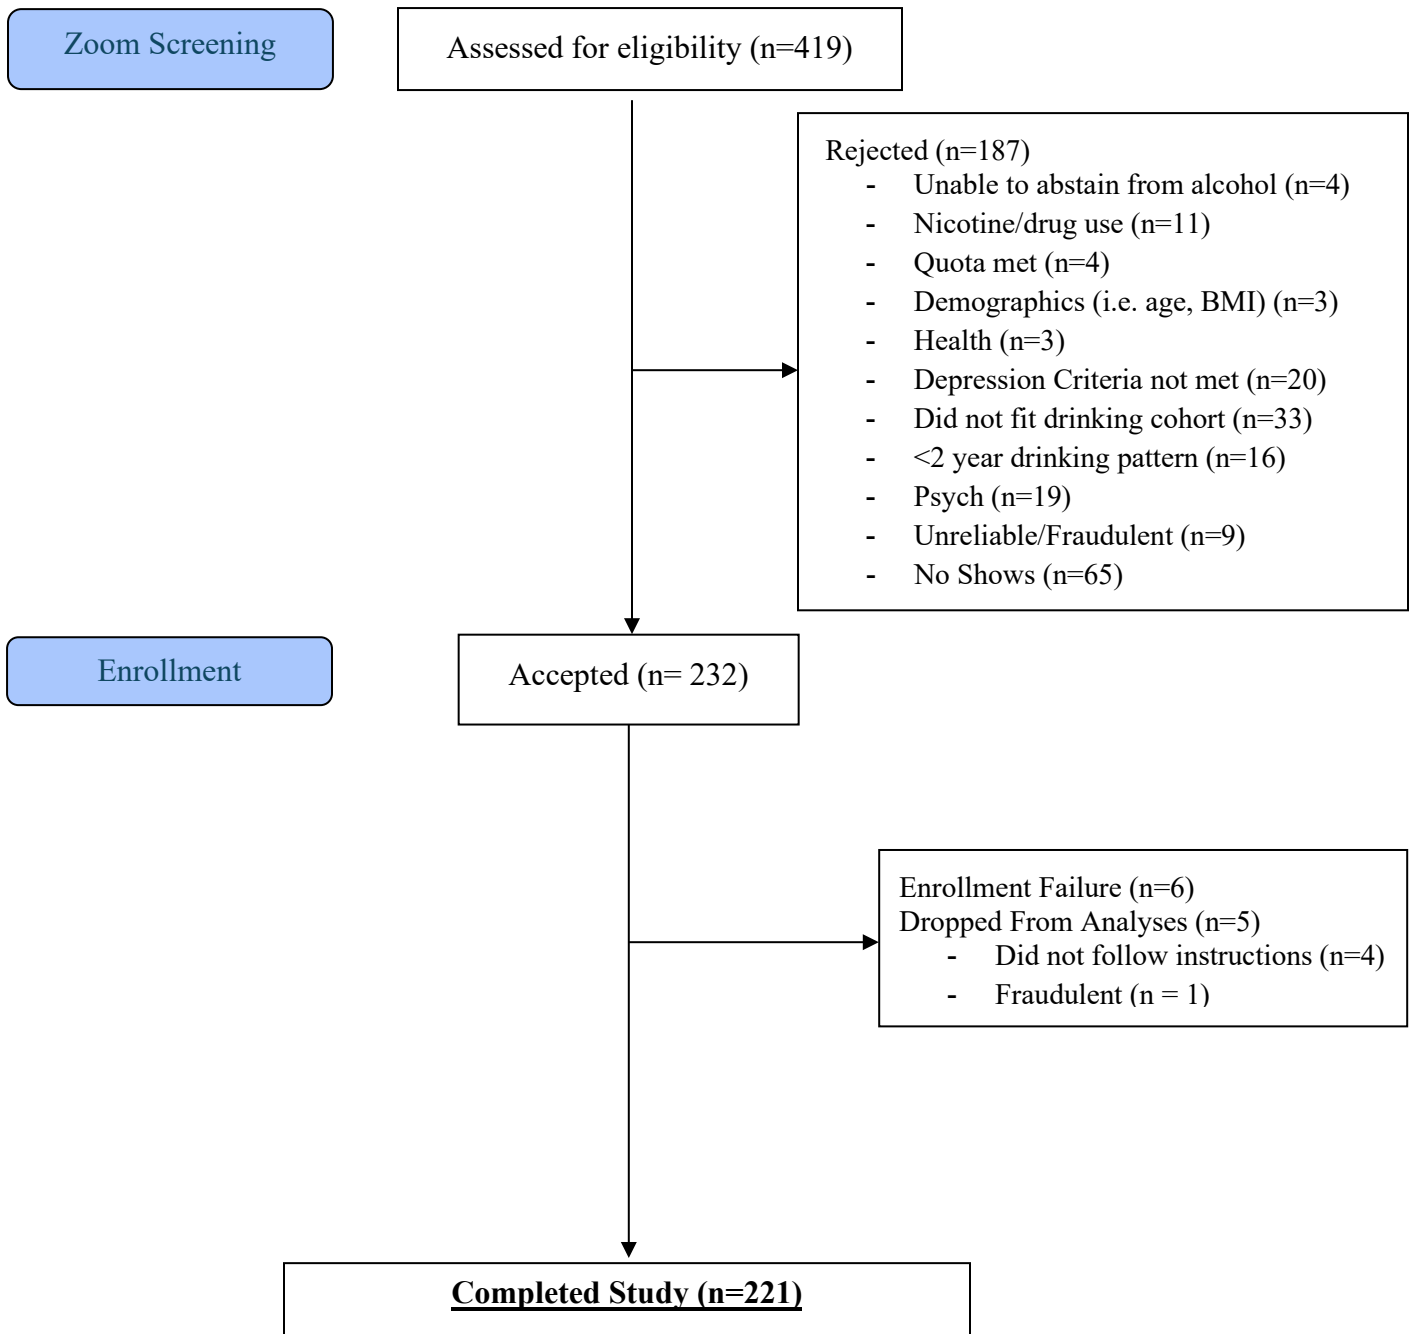

## Supplemental Table 1

Results of linear mixed effects models conducted separately in AUD- and AUD+ groups on eBAC, feel beverage effects and primary outcomes (stimulation, sedation, liking, wanting more, and negative affect). For stimulation, sedation and negative affect, baseline measures were included as a covariate.

| AUD-                              |          |          |        |        | AUD+                              |          |          |        |        |
|-----------------------------------|----------|----------|--------|--------|-----------------------------------|----------|----------|--------|--------|
| eBAC                              |          |          |        |        |                                   |          |          |        |        |
| Effect                            | df (num) | df (den) | F      | Pr > F | Effect                            | df (num) | df (den) | F      | Pr > F |
| Cohort <sup>a</sup>               | 1        | 1307     | 0.03   | 0.8539 | Cohort <sup>a</sup>               | 1        | 1444     | 0.02   | 0.8777 |
| Episode <sup>b</sup>              | 1        | 1307     | 256.22 | <.0001 | Episode <sup>b</sup>              | 1        | 1444     | 213.80 | <.0001 |
| Cohort * episode                  | 1        | 1307     | 0.08   | 0.7746 | Cohort * episode                  | 1        | 1444     | 3.11   | 0.0779 |
| Time                              | 1        | 99       | 0.00   | 0.9507 | Time                              | 1        | 118      | 0.01   | 0.9165 |
| Cohort * time                     | 1        | 1307     | 0.08   | 0.7769 | Cohort * time                     | 1        | 1444     | 0.95   | 0.3291 |
| Episode * time                    | 1        | 1307     | 36.06  | <.0001 | Episode * time                    | 1        | 1444     | 431.29 | <.0001 |
| Cohort * episode * time           | 1        | 1307     | 2.82   | 0.0933 | Cohort * episode * time           | 1        | 1444     | 14.25  | 0.0002 |
| eBAC                              | --       | --       | --     | --     | eBAC                              | --       | --       | --     | --     |
| Feel                              |          |          |        |        |                                   |          |          |        |        |
| Effect                            | df (num) | df (den) | F      | Pr > F | Effect                            | df (num) | df (den) | F      | Pr > F |
| Cohort <sup>a</sup>               | 1        | 1306     | 1.33   | 0.2492 | Cohort <sup>a</sup>               | 1        | 1443     | 8.86   | 0.0030 |
| Episode <sup>b</sup>              | 1        | 1306     | 12.95  | 0.0003 | Episode <sup>b</sup>              | 1        | 1443     | 6.03   | 0.0142 |
| Cohort * episode                  | 1        | 1306     | 8.43   | 0.0037 | Cohort * episode                  | 1        | 1443     | 2.23   | 0.1355 |
| Time                              | 1        | 99       | 2.39   | 0.1249 | Time                              | 1        | 118      | 42.85  | <.0001 |
| Cohort * time                     | 1        | 1306     | 0.71   | 0.3999 | Cohort * time                     | 1        | 1443     | 0.83   | 0.3614 |
| Episode * time                    | 1        | 1306     | 4.59   | 0.0324 | Episode * time                    | 1        | 1443     | 75.11  | <.0001 |
| Cohort * episode * time           | 1        | 1306     | 0.00   | 0.9603 | Cohort * episode * time           | 1        | 1443     | 1.93   | 0.1644 |
| eBAC                              | 1        | 1306     | 107.25 | <.0001 | eBAC                              | 1        | 1443     | 97.33  | <.0001 |
| Stimulation                       |          |          |        |        |                                   |          |          |        |        |
| Effect                            | df (num) | df (den) | F      | Pr > F | Effect                            | df (num) | df (den) | F      | Pr > F |
| Baseline stimulation <sup>c</sup> | 1        | 1305     | 346.26 | <.0001 | Baseline stimulation <sup>c</sup> | 1        | 1442     | 131.2  | <.0001 |
| Cohort <sup>a</sup>               | 1        | 1305     | 0.02   | 0.8820 | Cohort <sup>a</sup>               | 1        | 1442     | 0.75   | 0.3871 |
| Episode <sup>b</sup>              | 1        | 1305     | 19.42  | <.0001 | Episode <sup>b</sup>              | 1        | 1442     | 77.83  | <.0001 |
| Cohort * episode                  | 1        | 1305     | 3.02   | 0.0823 | Cohort * episode                  | 1        | 1442     | 0.03   | 0.8706 |
| Time                              | 1        | 99       | 105.32 | <.0001 | Time                              | 1        | 118      | 62.52  | <.0001 |
| Cohort * time                     | 1        | 1305     | 3.54   | 0.0601 | Cohort * time                     | 1        | 1442     | 0.13   | 0.7139 |
| Episode * time                    | 1        | 1305     | 8.78   | 0.0031 | Episode * time                    | 1        | 1442     | 2.53   | 0.1118 |
| Cohort * episode * time           | 1        | 1305     | 0.42   | 0.5146 | Cohort * episode * time           | 1        | 1442     | 0.18   | 0.6715 |
| eBAC                              | 1        | 1305     | 11.91  | 0.0006 | eBAC                              | 1        | 1442     | 65.93  | <.0001 |
| Like                              |          |          |        |        |                                   |          |          |        |        |
| Effect                            | df (num) | df (den) | F      | Pr > F | Effect                            | df (num) | df (den) | F      | Pr > F |
| Cohort <sup>a</sup>               | 1        | 1306     | 0.27   | 0.6015 | Cohort <sup>a</sup>               | 1        | 1442     | 5.07   | 0.0246 |
| Episode <sup>b</sup>              | 1        | 1306     | 30.24  | <.0001 | Episode <sup>b</sup>              | 1        | 1442     | 37.95  | <.0001 |
| Cohort * episode                  | 1        | 1306     | 2.43   | 0.1192 | Cohort * episode                  | 1        | 1442     | 0.53   | 0.4659 |
| Time                              | 1        | 99       | 26.19  | <.0001 | Time                              | 1        | 118      | 7.15   | 0.0086 |
| Cohort * time                     | 1        | 1306     | 0.90   | 0.3431 | Cohort * time                     | 1        | 1442     | 0.01   | 0.9192 |
| Episode * time                    | 1        | 1306     | 1.10   | 0.2947 | Episode * time                    | 1        | 1442     | 14.96  | 0.0001 |
| Cohort * episode * time           | 1        | 1306     | 2.28   | 0.1316 | Cohort * episode * time           | 1        | 1442     | 6.18   | 0.0130 |
| eBAC                              | 1        | 1306     | 10.41  | 0.0013 | eBAC                              | 1        | 1442     | 69.85  | <.0001 |
| eBAC                              | 1        | 1305     | 3.97   | 0.0464 | eBAC                              | 1        | 1442     | 9.08   | 0.002  |

## AUD-

## AUD+

| Negative Affect                       |          |          |        |        |                                       |          |          |        |        |
|---------------------------------------|----------|----------|--------|--------|---------------------------------------|----------|----------|--------|--------|
| Effect                                | df (num) | df (den) | F      | Pr > F | Effect                                | df (num) | df (den) | F      | Pr > F |
| Baseline negative affect <sup>c</sup> | 1        | 1305     | 546.85 | <.0001 | Baseline negative affect <sup>c</sup> | 1        | 1442     | 293.43 | <.0001 |
| Cohort <sup>a</sup>                   | 1        | 1305     | 5.35   | 0.0209 | Cohort <sup>a</sup>                   | 1        | 1442     | 4.48   | 0.0345 |
| Episode <sup>b</sup>                  | 1        | 1305     | 19.47  | <.0001 | Episode <sup>b</sup>                  | 1        | 1442     | 63.24  | <.0001 |
| Cohort * episode                      | 1        | 1305     | 3.02   | 0.0825 | Cohort * episode                      | 1        | 1442     | 1.20   | 0.2743 |
| Time                                  | 1        | 99       | 0.03   | 0.8611 | Time                                  | 1        | 118      | 2.43   | 0.1218 |
| Cohort * time                         | 1        | 1305     | 2.28   | 0.1317 | Cohort * time                         | 1        | 1442     | 0.07   | 0.7955 |
| Episode * time                        | 1        | 1305     | 7.72   | 0.0055 | Episode * time                        | 1        | 1442     | 1.26   | 0.2612 |
| Cohort * episode * time               | 1        | 1305     | 0.03   | 0.8638 | Cohort * episode * time               | 1        | 1442     | 1.27   | 0.2603 |
| eBAC                                  | 1        | 1305     | 3.32   | 0.0689 | eBAC                                  | 1        | 1442     | 8.13   | 0.0044 |
| Want More                             |          |          |        |        |                                       |          |          |        |        |
| Effect                                | df (num) | df (den) | F      | Pr > F | Effect                                | df (num) | df (den) | F      | Pr > F |
| Cohort <sup>a</sup>                   | 1        | 1306     | 0.63   | 0.4284 | Cohort <sup>a</sup>                   | 1        | 1443     | 4.43   | 0.0354 |
| Episode <sup>b</sup>                  | 1        | 1306     | 35.81  | <.0001 | Episode <sup>b</sup>                  | 1        | 1443     | 178.00 | <.0001 |
| Cohort * episode                      | 1        | 1306     | 3.12   | 0.0775 | Cohort * episode                      | 1        | 1443     | 0.03   | 0.8645 |
| Time                                  | 1        | 99       | 153.98 | <.0001 | Time                                  | 1        | 118      | 86.13  | <.0001 |
| Cohort * time                         | 1        | 1306     | 2.17   | 0.1408 | Cohort * time                         | 1        | 1443     | 1.41   | 0.2345 |
| Episode * time                        | 1        | 1306     | 25.89  | <.0001 | Episode * time                        | 1        | 1443     | 5.90   | 0.0152 |
| Cohort * episode * time               | 1        | 1306     | 3.62   | 0.0575 | Cohort * episode * time               | 1        | 1443     | 0.19   | 0.6607 |
| eBAC                                  | 1        | 1306     | 5.35   | 0.0209 | eBAC                                  | 1        | 1443     | 40.91  | <.0001 |
| Sedation                              |          |          |        |        |                                       |          |          |        |        |
| Effect                                | df (num) | df (den) | F      | Pr > F | Effect                                | df (num) | df (den) | F      | Pr > F |
| Baseline sedation <sup>c</sup>        | 1        | 1305     | 66.73  | <.0001 | Baseline sedation <sup>c</sup>        | 1        | 1442     | 194.00 | <.0001 |
| Cohort <sup>a</sup>                   | 1        | 1305     | 10.46  | 0.0012 | Cohort <sup>a</sup>                   | 1        | 1442     | 2.63   | 0.1049 |
| Episode <sup>b</sup>                  | 1        | 1305     | 0.15   | 0.6941 | Episode <sup>b</sup>                  | 1        | 1442     | 0.06   | 0.8138 |
| Cohort * episode                      | 1        | 1305     | 0.66   | 0.4169 | Cohort * episode                      | 1        | 1442     | 1.53   | 0.2162 |
| Time                                  | 1        | 99       | 56.31  | <.0001 | Time                                  | 1        | 118      | 46.62  | <.0001 |
| Cohort * time                         | 1        | 1305     | 8.36   | 0.0039 | Cohort * time                         | 1        | 1442     | 0.01   | 0.9417 |
| Episode * time                        | 1        | 1305     | 16.77  | <.0001 | Episode * time                        | 1        | 1442     | 7.00   | 0.0082 |
| Cohort * episode * time               | 1        | 1305     | 0.83   | 0.3638 | Cohort * episode * time               | 1        | 1442     | 1.00   | 0.3183 |
| eBAC                                  | 1        | 1305     | 3.97   | 0.0464 | eBAC                                  | 1        | 1442     | 9.08   | 0.002  |

<sup>a</sup>Coded as 1 (comorbid depressive disorder present; DEP+) or 0 (comorbid depressive disorder absent, DEP-).

<sup>b</sup>Coded as 1 (alcohol-drinking episode) or 0 (non-alcohol drinking episode).

<sup>c</sup>Assessed at the baseline time assessment prior to starting the episode.

AUD = Alcohol use disorder; eBAC = estimated blood alcohol concentration.

**Supplemental Table 2: Post-Hoc comparisons and P-values**

| AUD -                                          |         | AUD +                                          |         |
|------------------------------------------------|---------|------------------------------------------------|---------|
| eBAC                                           |         |                                                |         |
| Comparison                                     | P-Value | Comparison                                     | P-Value |
| slope: drinking early vs late                  | 0.9418  | slope: drinking early vs late                  | 0.0557  |
| slope: drinking early vs non-drinking early    | <.0001  | slope: drinking early vs non-drinking early    | 0.9999  |
| slope: drinking early vs non-drinking late     | <.0001  | slope: drinking early vs non-drinking late     | <.0001  |
| slope: drinking late vs non-drinking late      | <.0001  | slope: drinking late vs non-drinking late      | <.0001  |
| slope: drinking late vs non-drinking early     | <.0001  | slope: drinking late vs non-drinking early     | <.0001  |
| slope: non-drinking late vs non-drinking early | 0.3521  | slope: non-drinking late vs non-drinking early | <.0001  |
| difference in episodes at timehour=0           | <.0001  | difference in episodes at timehour=0           | 0.0404  |
| difference in episodes at timehour=0.15        | <.0001  | difference in episodes at timehour=0.15        | <.0001  |
| difference in episodes at timehour=0.5         | <.0001  | difference in episodes at timehour=0.5         | <.0001  |
| difference in episodes at timehour=1           | <.0001  | difference in episodes at timehour=1           | <.0001  |
| difference in episodes at timehour=1.5         | <.0001  | difference in episodes at timehour=1.5         | <.0001  |
| difference in episodes at timehour=2           | <.0001  | difference in episodes at timehour=2           | <.0001  |
| difference in episodes at timehour=2.5         | <.0001  | difference in episodes at timehour=2.5         | <.0001  |
| difference in episodes at timehour=3           | <.0001  | difference in episodes at timehour=3           | <.0001  |
| Feel                                           |         |                                                |         |
| Comparison                                     | P-Value | Comparison                                     | P-Value |
| slope: drinking early vs late                  | 0.0177  | slope: drinking early vs late                  | <.0001  |
| slope: drinking early vs non-drinking early    | <.0001  | slope: drinking early vs non-drinking early    | <.0001  |
| slope: drinking early vs non-drinking late     | 0.0079  | slope: drinking early vs non-drinking late     | <.0001  |
| slope: drinking late vs non-drinking late      | 0.4673  | slope: drinking late vs non-drinking late      | 0.0653  |
| slope: drinking late vs non-drinking early     | 1.0000  | slope: drinking late vs non-drinking early     | 0.1003  |
| slope: non-drinking late vs non-drinking early | 0.5638  | slope: non-drinking late vs non-drinking early | 0.9801  |
| difference in episodes at timehour=0           | 0.5229  | difference in episodes at timehour=0           | 0.1942  |
| difference in episodes at timehour=0.15        | 0.7025  | difference in episodes at timehour=0.15        | 0.4963  |
| difference in episodes at timehour=0.5         | 0.6995  | difference in episodes at timehour=0.5         | 0.2532  |
| difference in episodes at timehour=1           | 0.0383  | difference in episodes at timehour=1           | <.0001  |
| difference in episodes at timehour=1.5         | <.0001  | difference in episodes at timehour=1.5         | <.0001  |
| difference in episodes at timehour=2           | <.0001  | difference in episodes at timehour=2           | <.0001  |
| difference in episodes at timehour=2.5         | <.0001  | difference in episodes at timehour=2.5         | <.0001  |
| difference in episodes at timehour=3           | <.0001  | difference in episodes at timehour=3           | <.0001  |

P-values adjusted for multiple comparisons using Tukey-Kramer method

Early: 0-2 hours; Late: 2.5-3 hours

| AUD -                                          |                | AUD +                                          |                |
|------------------------------------------------|----------------|------------------------------------------------|----------------|
| <b>Stimulation</b>                             |                |                                                |                |
| <b>Comparison</b>                              | <b>P-Value</b> | <b>Comparison</b>                              | <b>P-Value</b> |
| slope: drinking early vs drinking late         | 0.9415         | slope: drinking early vs drinking late         | 0.2437         |
| slope: drinking early vs non-drinking early    | 0.0112         | slope: drinking early vs non-drinking early    | <.0001         |
| slope: drinking early vs non-drinking late     | 0.9652         | slope: drinking early vs non-drinking late     | <.0001         |
| slope: drinking late vs non-drinking late      | 0.4893         | slope: drinking late vs non-drinking late      | 0.0024         |
| slope: drinking late vs non-drinking early     | 0.9996         | slope: drinking late vs non-drinking early     | 0.02           |
| slope: non-drinking late vs non-drinking early | 0.4735         | slope: non-drinking late vs non-drinking early | 0.9998         |
| difference in episodes at timehour=0           | 0.2316         | difference in episodes at timehour=0           | 0.0001         |
| difference in episodes at timehour=0.15        | 0.22           | difference in episodes at timehour=0.15        | <.0001         |
| difference in episodes at timehour=0.5         | 0.1916         | difference in episodes at timehour=0.5         | <.0001         |
| difference in episodes at timehour=1           | 0.1559         | difference in episodes at timehour=1           | <.0001         |
| difference in episodes at timehour=1.5         | 0.1611         | difference in episodes at timehour=1.5         | <.0001         |
| difference in episodes at timehour=2           | 0.2971         | difference in episodes at timehour=2           | <.0001         |
| difference in episodes at timehour=2.5         | 0.5749         | difference in episodes at timehour=2.5         | <.0001         |
| difference in episodes at timehour=3           | 0.8273         | difference in episodes at timehour=3           | 0.0002         |
| <b>Like</b>                                    |                |                                                |                |
| <b>Comparison</b>                              | <b>P-Value</b> | <b>Comparison</b>                              | <b>P-Value</b> |
| slope: drinking early vs drinking late         | 0.6617         | slope: drinking early vs drinking late         | 0.2966         |
| slope: drinking early vs non-drinking early    | <.0001         | slope: drinking early vs non-drinking early    | <.0001         |
| slope: drinking early vs non-drinking late     | 0.0963         | slope: drinking early vs non-drinking late     | <.0001         |
| slope: drinking late vs non-drinking late      | <.0001         | slope: drinking late vs non-drinking late      | <.0001         |
| slope: drinking late vs non-drinking early     | 0.8224         | slope: drinking late vs non-drinking early     | 0.0182         |
| slope: non-drinking late vs non-drinking early | 0.0153         | slope: non-drinking late vs non-drinking early | 0.4933         |
| difference in episodes at timehour=0           | 0.5764         | difference in episodes at timehour=0           | 0.1236         |
| difference in episodes at timehour=0.15        | 0.3954         | difference in episodes at timehour=0.15        | 0.0451         |
| difference in episodes at timehour=0.5         | 0.0875         | difference in episodes at timehour=0.5         | 0.0009         |
| difference in episodes at timehour=1           | 0.0004         | difference in episodes at timehour=1           | <.0001         |
| difference in episodes at timehour=1.5         | <.0001         | difference in episodes at timehour=1.5         | <.0001         |
| difference in episodes at timehour=2           | <.0001         | difference in episodes at timehour=2           | <.0001         |
| difference in episodes at timehour=2.5         | <.0001         | difference in episodes at timehour=2.5         | <.0001         |
| difference in episodes at timehour=3           | <.0001         | difference in episodes at timehour=3           | <.0001         |

P-values adjusted for multiple comparisons using Tukey-Kramer method

Early: 0-2 hours; Late: 2.5-3 hours

| AUD -                                          |         | AUD +                                          |         |
|------------------------------------------------|---------|------------------------------------------------|---------|
| Negative Affect                                |         |                                                |         |
| Comparison                                     | P-Value | Comparison                                     | P-Value |
| slope: drinking early vs drinking late         | <.0001  | slope: drinking early vs drinking late         | 0.7809  |
| slope: drinking early vs non-drinking early    | <.0001  | slope: drinking early vs non-drinking early    | 0.0178  |
| slope: drinking early vs non-drinking late     | <.0001  | slope: drinking early vs non-drinking late     | 0.4691  |
| slope: drinking late vs non-drinking late      | 0.0003  | slope: drinking late vs non-drinking late      | 0.7983  |
| slope: drinking late vs non-drinking early     | 0.9998  | slope: drinking late vs non-drinking early     | 0.9848  |
| slope: non-drinking late vs non-drinking early | <.0001  | slope: non-drinking late vs non-drinking early | 0.9726  |
| difference in episodes at timehour=0           | <.0001  | difference in episodes at timehour=0           | 0.1169  |
| difference in episodes at timehour=0.15        | <.0001  | difference in episodes at timehour=0.15        | 0.109   |
| difference in episodes at timehour=0.5         | <.0001  | difference in episodes at timehour=0.5         | 0.0907  |
| difference in episodes at timehour=1           | <.0001  | difference in episodes at timehour=1           | 0.0705  |
| difference in episodes at timehour=1.5         | <.0001  | difference in episodes at timehour=1.5         | 0.0815  |
| difference in episodes at timehour=2           | <.0001  | difference in episodes at timehour=2           | 0.2147  |
| difference in episodes at timehour=2.5         | <.0001  | difference in episodes at timehour=2.5         | 0.5438  |
| difference in episodes at timehour=3           | <.0001  | difference in episodes at timehour=3           | 0.8673  |

P-values adjusted for multiple comparisons using Tukey-Kramer method  
 Early: 0-2 hours; Late: 2.5-3 hours

| AUD -                                          |         | AUD +                                          |         |
|------------------------------------------------|---------|------------------------------------------------|---------|
| <b>Want More</b>                               |         |                                                |         |
| Comparison                                     | P-Value | Comparison                                     | P-Value |
| slope: drinking early vs drinking late         | 0.8937  | slope: drinking early vs drinking late         | 0.0183  |
| slope: drinking early vs non-drinking early    | 0.0526  | slope: drinking early vs non-drinking early    | <.0001  |
| slope: drinking early vs non-drinking late     | 0.9784  | slope: drinking early vs non-drinking late     | <.0001  |
| slope: drinking late vs non-drinking late      | 0.0711  | slope: drinking late vs non-drinking late      | <.0001  |
| slope: drinking late vs non-drinking early     | 0.7912  | slope: drinking late vs non-drinking early     | 0.0128  |
| slope: non-drinking late vs non-drinking early | 0.6415  | slope: non-drinking late vs non-drinking early | 0.3059  |
| difference in episodes at timehour=0           | 0.0031  | difference in episodes at timehour=0           | <.0001  |
| difference in episodes at timehour=0.15        | 0.0032  | difference in episodes at timehour=0.15        | <.0001  |
| difference in episodes at timehour=0.5         | 0.004   | difference in episodes at timehour=0.5         | <.0001  |
| difference in episodes at timehour=1           | 0.0094  | difference in episodes at timehour=1           | <.0001  |
| difference in episodes at timehour=1.5         | 0.0764  | difference in episodes at timehour=1.5         | <.0001  |
| difference in episodes at timehour=2           | 0.7417  | difference in episodes at timehour=2           | <.0001  |
| difference in episodes at timehour=2.5         | 0.3801  | difference in episodes at timehour=2.5         | <.0001  |
| difference in episodes at timehour=3           | 0.1217  | difference in episodes at timehour=3           | <.0001  |
| <b>Sedation</b>                                |         |                                                |         |
| Comparison                                     | P-Value | Comparison                                     | P-Value |
| slope: drinking early vs drinking late         | 1.0000  | slope: drinking early vs drinking late         | 1.0000  |
| slope: drinking early vs non-drinking early    | 0.0847  | slope: drinking early vs non-drinking early    | 0.0847  |
| slope: drinking early vs non-drinking late     | 0.9995  | slope: drinking early vs non-drinking late     | 0.9995  |
| slope: drinking late vs non-drinking late      | 0.3173  | slope: drinking late vs non-drinking late      | 0.3173  |
| slope: drinking late vs non-drinking early     | 0.9992  | slope: drinking late vs non-drinking early     | 0.9992  |
| slope: non-drinking late vs non-drinking early | 0.4358  | slope: non-drinking late vs non-drinking early | 0.4358  |
| difference in episodes at timehour=0           | 0.3335  | difference in episodes at timehour=0           | 0.3335  |
| difference in episodes at timehour=0.15        | 0.4125  | difference in episodes at timehour=0.15        | 0.4125  |
| difference in episodes at timehour=0.5         | 0.7075  | difference in episodes at timehour=0.5         | 0.7075  |
| difference in episodes at timehour=1           | 0.5670  | difference in episodes at timehour=1           | 0.5670  |
| difference in episodes at timehour=1.5         | 0.0754  | difference in episodes at timehour=1.5         | 0.0754  |
| difference in episodes at timehour=2           | 0.0077  | difference in episodes at timehour=2           | 0.0077  |
| difference in episodes at timehour=2.5         | 0.0027  | difference in episodes at timehour=2.5         | 0.0027  |
| difference in episodes at timehour=3           | 0.0022  | difference in episodes at timehour=3           | 0.0022  |

P-values adjusted for multiple comparisons using Tukey-Kramer method  
 Early: 0-2 hours; Late: 2.5-3 hours

**Supplemental Table 3**

Demographics and drinking characteristics in AUD+: Mild vs. moderate-severe AUD

|                                      | Mild AUD<br>N=54 |      | Moderate-Severe AUD<br>N=66 |      | Significance    |
|--------------------------------------|------------------|------|-----------------------------|------|-----------------|
|                                      | N                | %    | N                           | %    |                 |
| Sex assigned at birth (male)         | 28               | 51.9 | 42                          | 63.6 | <i>ns</i>       |
| Race (white)                         | 43               | 79.6 | 50                          | 75.8 | <i>ns</i>       |
| Family history of AUD                | 22               | 40.7 | 33                          | 50.0 | <i>ns</i>       |
|                                      | Mean             | SD   | Mean                        | SD   |                 |
| Age (years)                          | 26.8             | 4.1  | 26.7                        | 4.6  | <i>ns</i>       |
| Education (years)                    | 16.2             | 1.9  | 15.4                        | 1.7  | <i>p</i> <0.05  |
| DSM-5 AUD symptoms                   | 2.5              | 0.5  | 5.7                         | 1.7  | <i>p</i> <0.001 |
| AUDIT                                | 13.6             | 4.4  | 18.7                        | 5.1  | <i>p</i> <0.001 |
| Age of first drink (years)           | 16.3             | 2.2  | 15.7                        | 2.3  | <i>ns</i>       |
| Drinks per drinking day <sup>1</sup> | 4.4              | 2.1  | 7.2                         | 2.5  | <i>p</i> <0.001 |
| Drinks per week <sup>1</sup>         | 16.0             | 6.0  | 34.3                        | 14.1 | <i>p</i> <0.001 |
| % Drinking days                      | 55.8             | 4.6  | 69.5                        | 4.6  | <i>p</i> <0.001 |
| % Heavy drinking days <sup>2</sup>   | 22.6             | 2.7  | 52.9                        | 4.9  | <i>p</i> <0.001 |
| % High intensity days <sup>3</sup>   | 5.0              | 2.3  | 21.0                        | 5.5  | <i>p</i> <0.001 |

Note. <sup>1</sup>In standard drink units (14g ethanol per drink); <sup>2</sup>Heavy drinking defined as consuming  $\geq 4$  standard drinks for a woman ( $\geq 5$  standard drinks for a man); <sup>3</sup>High intensity drinking defined as consuming  $\geq 8$  standard drinks for a woman ( $\geq 10$  standard drinks for a man). AUD = alcohol use disorder; DEP = depressive disorder; DSM-5 = Diagnostic and Statistical Manual of Mental Disorders, Fifth Edition; AUDIT = Alcohol Use Disorder Identification Test.



### Supplemental Analysis

The following analyses results are from exploratory mixed linear models in AUD+ that assessed the effects of AUD subgroup (mild vs. moderate-severe), episode (alcohol, non-alcohol), time, and their interactions, covarying for baseline score (when available) and eBAC.

#### Stimulation

| Effect                    | Num DF   | Den DF      | F Value      | Pr > F        |
|---------------------------|----------|-------------|--------------|---------------|
| baseline score            | 1        | 1443        | 133.51       | <.0001        |
| ebac                      | 1        | 1443        | 55.61        | <.0001        |
| group                     | 1        | 1443        | 0.08         | 0.7813        |
| episode                   | 1        | 1443        | 83.87        | <.0001        |
| group*episode             | 1        | 1443        | 0.23         | 0.6294        |
| time                      | 1        | 118         | 61.81        | <.0001        |
| group*time                | 1        | 1443        | 4.12         | 0.0425        |
| episode*time              | 1        | 1443        | 2.68         | 0.1016        |
| <b>group*episode*time</b> | <b>1</b> | <b>1443</b> | <b>10.26</b> | <b>0.0014</b> |

#### Wanting More

| Effect               | Num DF   | Den DF      | F Value     | Pr > F        |
|----------------------|----------|-------------|-------------|---------------|
| ebac                 | 1        | 1444        | 33.53       | <.0001        |
| group                | 1        | 1444        | 1.48        | 0.2234        |
| episode              | 1        | 1444        | 181.85      | <.0001        |
| <b>group*episode</b> | <b>1</b> | <b>1444</b> | <b>5.05</b> | <b>0.0248</b> |
| time                 | 1        | 118         | 85.49       | <.0001        |
| group*time           | 1        | 1444        | 3.77        | 0.0523        |
| episode*time         | 1        | 1444        | 4.85        | 0.0277        |
| group*episode*time   | 1        | 1444        | 0.09        | 0.7636        |

#### Liking

| Effect              | Num DF   | Den DF      | F Value      | Pr > F        |
|---------------------|----------|-------------|--------------|---------------|
| ebac                | 1        | 1443        | 64.2         | <.0001        |
| group               | 1        | 1443        | 0.01         | 0.924         |
| episode             | 1        | 1443        | 39.3         | <.0001        |
| group*episode       | 1        | 1443        | 0.34         | 0.562         |
| time                | 1        | 118         | 6.01         | 0.0157        |
| group*time          | 1        | 1443        | 0            | 0.997         |
| <b>episode*time</b> | <b>1</b> | <b>1443</b> | <b>13.57</b> | <b>0.0002</b> |
| group*episode*time  | 1        | 1443        | 1            | 0.3175        |

**Negative Affect**

| <b>Effect</b>      | <b>Num DF</b> | <b>Den DF</b> | <b>F Value</b> | <b>Pr &gt; F</b> |
|--------------------|---------------|---------------|----------------|------------------|
| baseline score     | 1             | 1443          | 294.56         | <.0001           |
| ebac               | 1             | 1443          | 6.33           | 0.012            |
| group              | 1             | 1443          | 0.31           | 0.5803           |
| <b>episode</b>     | <b>1</b>      | <b>1443</b>   | <b>69.43</b>   | <b>&lt;.0001</b> |
| group*episode      | 1             | 1443          | 0.07           | 0.7909           |
| time               | 1             | 118           | 2.91           | 0.0908           |
| group*time         | 1             | 1443          | 1.78           | 0.1824           |
| episode*time       | 1             | 1443          | 1.37           | 0.2428           |
| group*episode*time | 1             | 1443          | 0.01           | 0.9374           |

**Sedation**

| <b>Effect</b>       | <b>Num DF</b> | <b>Den DF</b> | <b>F Value</b> | <b>Pr &gt; F</b> |
|---------------------|---------------|---------------|----------------|------------------|
| baseline score      | 1             | 1443          | 211.6          | <.0001           |
| ebac                | 1             | 1443          | 10.19          | 0.0014           |
| group               | 1             | 1443          | 1.29           | 0.2557           |
| episode             | 1             | 1443          | 0.06           | 0.8134           |
| group*episode       | 1             | 1443          | 0              | 0.9632           |
| time                | 1             | 118           | 52.49          | <.0001           |
| group*time          | 1             | 1443          | 4.72           | 0.0301           |
| <b>episode*time</b> | <b>1</b>      | <b>1443</b>   | <b>8.34</b>    | <b>0.0039</b>    |
| group*episode*time  | 1             | 1443          | 0.54           | 0.4619           |
